# Supplementary material
Source: PubMed Central journal article supplement (PMC1400579)
Supplement: plntphys_140_3_818__1.pdf [file plntphys_140_3_818__1.pdf]

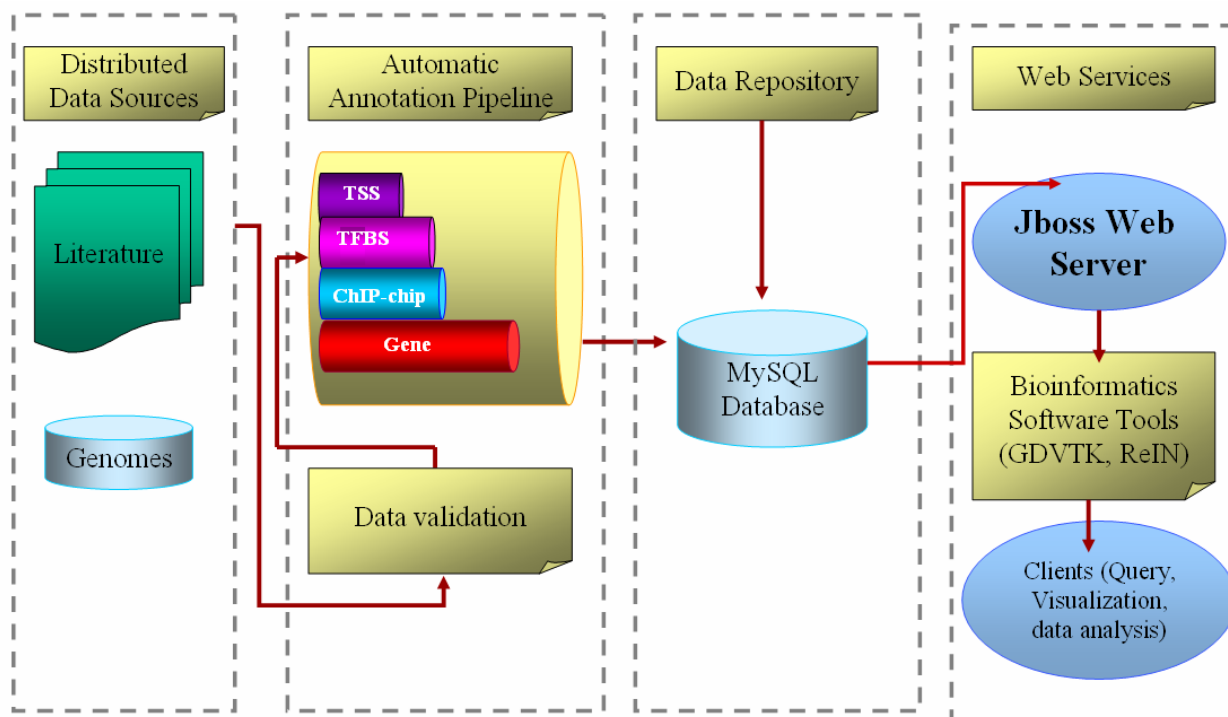

**Supplemental Figure 1.** Schematic overview of Bioinformatics Infrastructure describing data access and its web interface architecture
